# Supplementary material for: The SUN1-SPDYA interaction plays an essential role in meiosis prophase I
Source: PubMed Central journal article supplement (PMC8155084; doi:10.1038/s41467-021-23550-w), 2021-05-26
Supplement: 41467_2021_23550_MOESM1_ESM.pdf [file 41467_2021_23550_MOESM1_ESM.pdf]

## **Supplementary Information**

### **The SUN1-SPDYA interaction plays an essential role in meiosis prophase I**

Y Chen, Y Wang et al

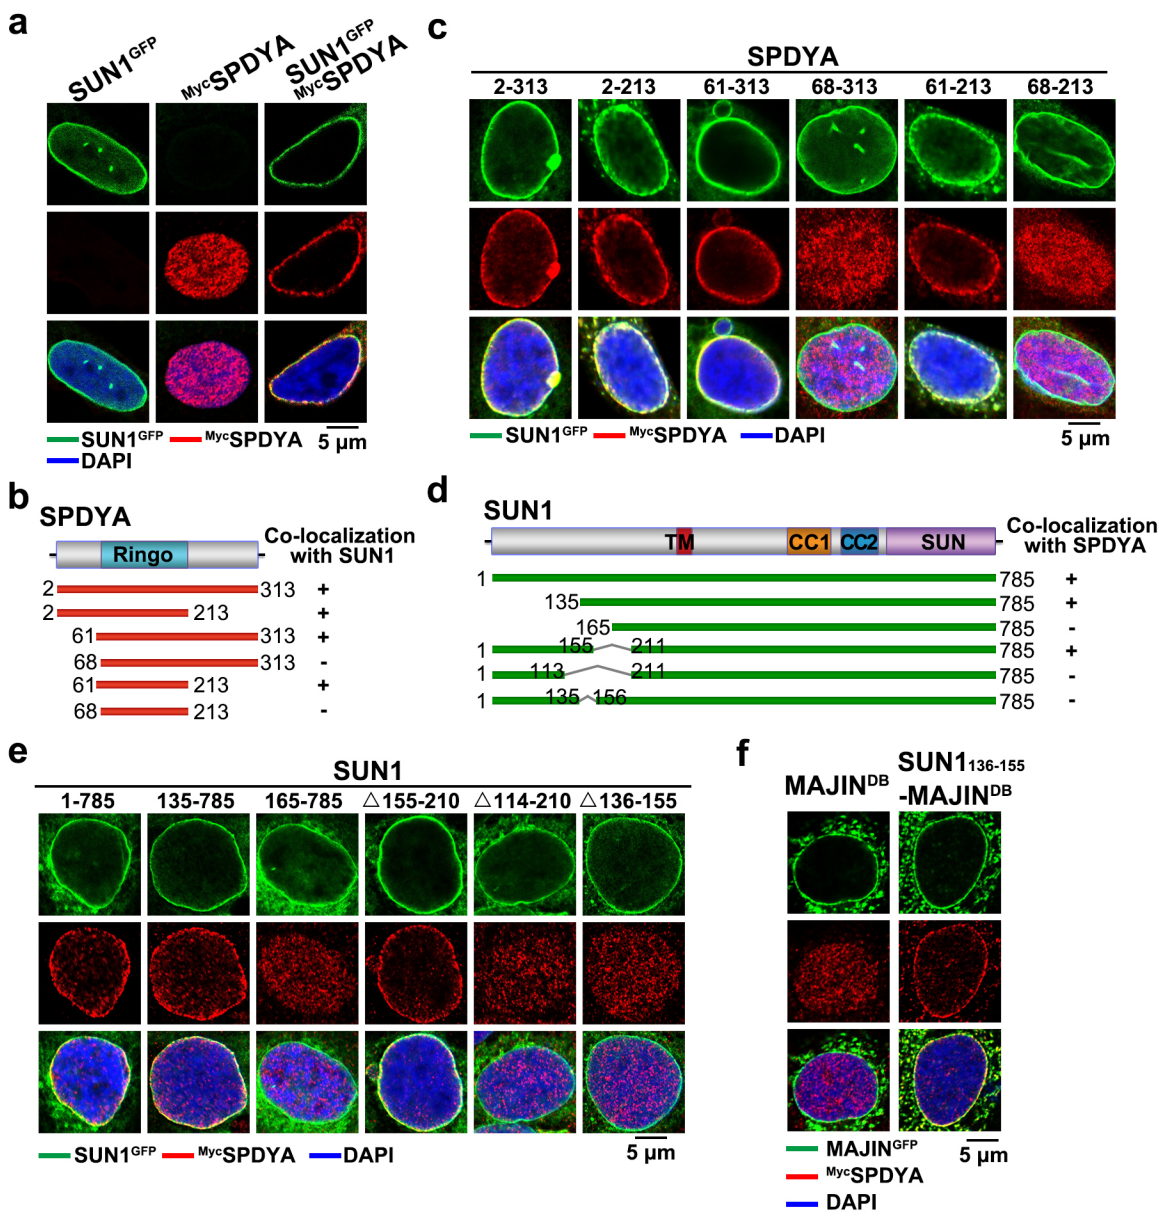

**Supplementary Figure 1: Characterization of the interaction between SUN1 and SPDYA.**

**a**, Equator images of U-2 OS cells expressing SUN1-GFP (green) and/or Myc-SPDYA. Cells were immunostained with anti-Myc antibody (red). DNA was stained by DAPI (blue). Scale bar, 5  $\mu$ m.

**b**, Co-localization analysis of ectopically expressed SUN1-GFP and various Myc-SPDYA fragments. **c**, Representative IF images for panel **b**. U-2 OS cells expressing SUN1-GFP (green) and Myc-SPDYA were immunostained with anti-Myc antibody (red). Scale bar, 5  $\mu$ m. **d**, Co-localization analysis of ectopically expressed Myc-SPDYA and various SUN1-GFP fragments. **e**, Representative IF images for panel **d**. U-2 OS cells expressing SUN1-GFP (green) and Myc-SPDYA were stained with anti-Myc antibody (red). TM: trans-membrane; CC: coiled-coil domains. Scale bar, 5  $\mu$ m. **f**, Equator images of U-2 OS cells expressing MAJIN<sup>DB</sup>-GFP or SUN1<sub>136-155</sub>-MAJIN<sup>DB</sup>-GFP (green) together with Myc-SPDYA (red). Ectopically expressed DNA-binding defective mutant MAJIN (MAJIN<sup>DB</sup>) exhibited clear nuclear membrane localization<sup>13</sup>. Scale bar, 5  $\mu$ m.

**a**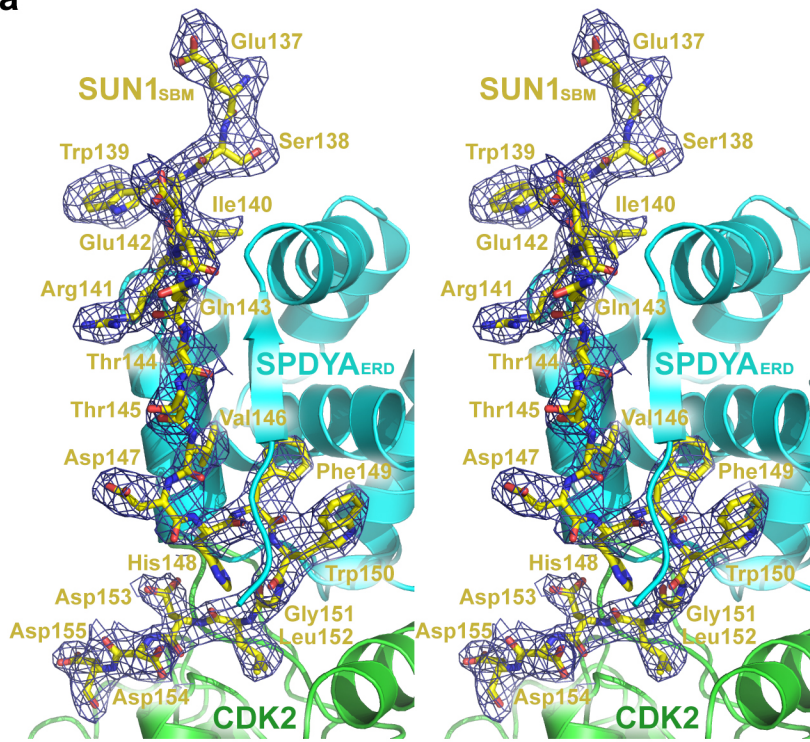**c**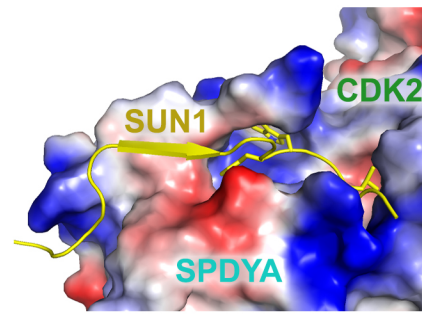**b**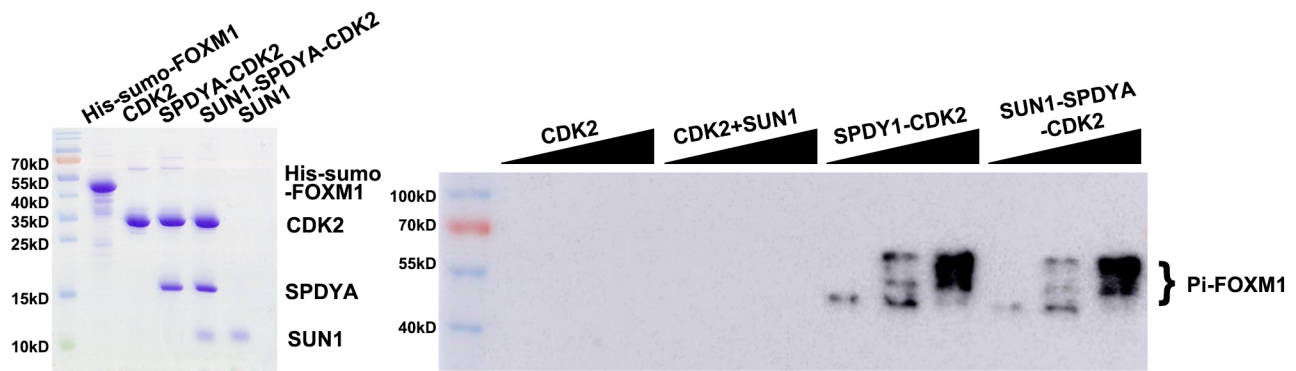

**Supplementary Figure 2: Structural and phosphorylation analyses of the SUN1<sub>SBM</sub>-SPDYA<sub>ERD</sub>-CDK2 complex.**

**a**, Stereo view of the SUN1<sub>SBM</sub>-SPDYA<sub>ERD</sub>-CDK2 complex focused on the SUN1<sub>SBM</sub> polypeptide. The electron density (2Fo-Fc) map of SUN<sub>SBM</sub> contoured at 1.0  $\sigma$  is shown in the complex. **b**, Phosphorylation analysis of His-Sumo-FoxM1<sub>526-748</sub> by the indicated protein or protein complexes. His-Sumo-FoxM1<sub>526-748</sub>, SUN1<sub>131-160</sub>, CDK2 and CDK2 complexes were expressed in bacteria and purified by affinity chromatograph. A Coomassie blue-stained gel showed the purified recombinant proteins (left). *In vitro* kinase assay was performed by incubating CDK2 or CDK2 complex as indicated at three different concentrations (0.03  $\mu$ M, 0.1  $\mu$ M, 0.3  $\mu$ M), together with 1  $\mu$ M FoxM1 substrate at 30 °C for 20 min. Phosphorylation of FoxM1 was detected by western blotting using anti-phospho-Thr-Pro antibody (right). **c**, Electrostatic surface potential of SUN1<sub>SBM</sub> binding site in the SPDYA<sub>ERD</sub>-CDK2 complex. Positive potential, blue; negative potential, red. Source data are provided as a Source Data file.

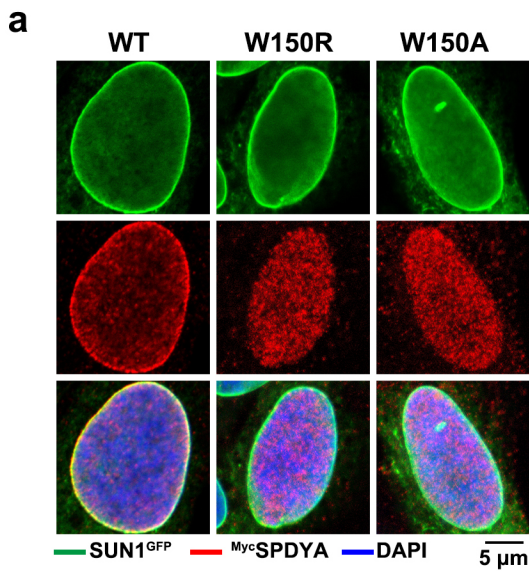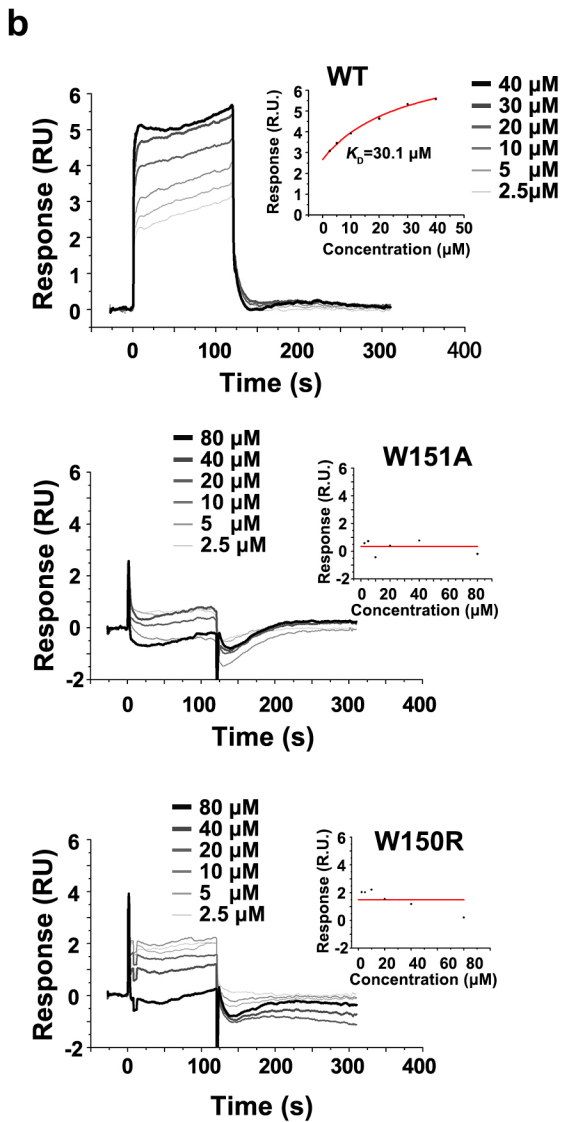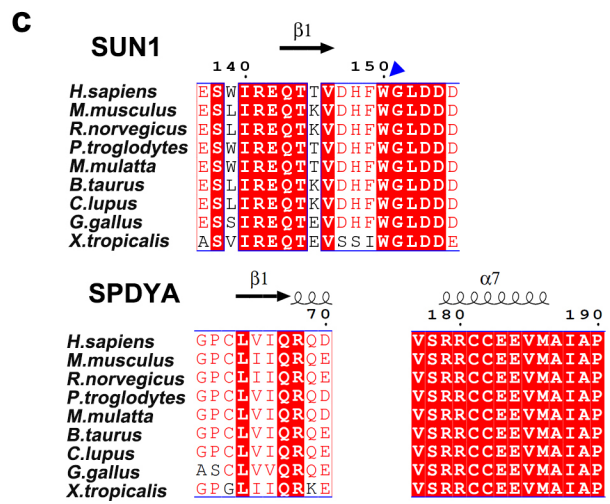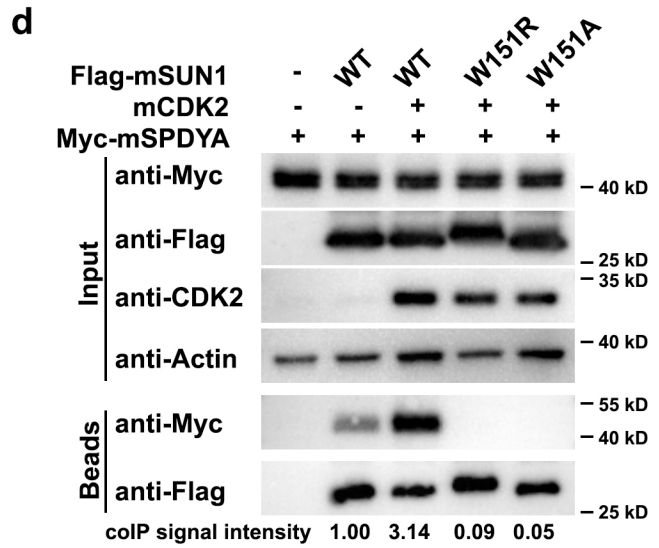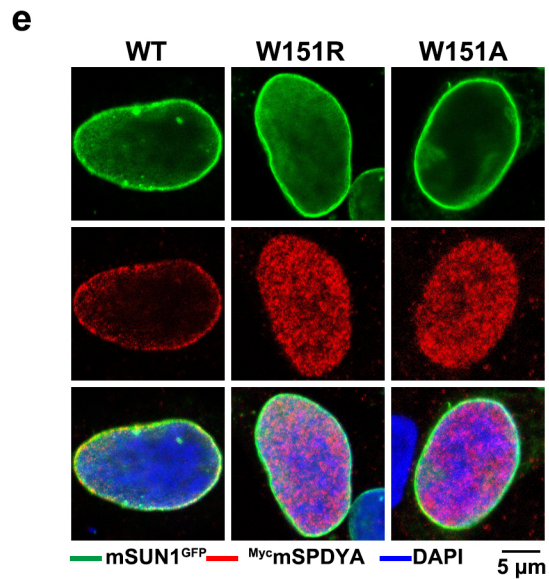

### Supplementary Figure 3: Mutational analysis of the SUN1-SPDYA interface.

**a**, Equator images of U-2 OS cells expressing human SUN1-GFP (green) and Myc-SPDYA. Cells were immunostained with anti-Myc antibody (red). Scale bar, 5  $\mu$ m. **b**, Surface plasmon resonance measurements showing that WT SUN1<sub>131-160</sub> fragment bound to the SPDYA<sub>ERD</sub>-CDK2 complex in a concentration-dependent manner. Graphs of equilibrium response unit versus SUN1 concentrations were plotted. The estimated  $K_D$  for WT interaction is 30.1  $\mu$ M. **c**, Multiple sequence alignments of SUN1 (residues 137-155) and SPDYA (residues 61-70 and 177-190) homologs from various species. Sequence positions are shown based on the human SUN1 and human SPDYA, respectively. SUN1 sequences used for alignment are from: *H. sapiens*, O94901; *M. musculus*, Q9D666; *R. norvegicus*, Q5U2W0; *P. troglodytes*, H2QU30; *M. mulatta*, F7HLL7; *B. taurus*, G3MWU2; *C. lupus*, E2R8J5; *G. gallus*, E1BQ86; *X. tropicalis*, A0A5G3KJ67. SPDYA sequences are from: *H. sapiens*, Q5MJ70; *M. musculus*, Q5IBH7; *R. norvegicus*, Q8R496; *P. troglodytes*, A0A2J8K0K9; *M. mulatta*, F6Y2M5; *B. taurus*, F1MBL9; *C. lupus*, J9P8P8; *G. gallus*, E1C1Y3; *X. tropicalis*, A8E5U5. **d**, Co-IP of ectopically expressed mouse Flag-SUN1<sub>1-210</sub>, Myc-SPDYA and CDK2 in HEK293T cells. The immunoprecipitation was performed with anti-Flag beads. The levels of each protein in the input and IP samples were analyzed by immunoblotting with the indicated antibodies. Band intensity of blots was quantified by the ImageJ software and the co-IP signal for the sample with expression of WT Flag-SUN1<sub>1-210</sub> and Myc-SPDYA was set as 1. **e**, Equator images of U-2 OS cells expressing mouse SUN1-GFP (green) and Myc-SPDYA. Cells were immunostained with anti-Myc antibody (red). Scale bar, 5  $\mu$ m. Source data are provided as a Source Data file.

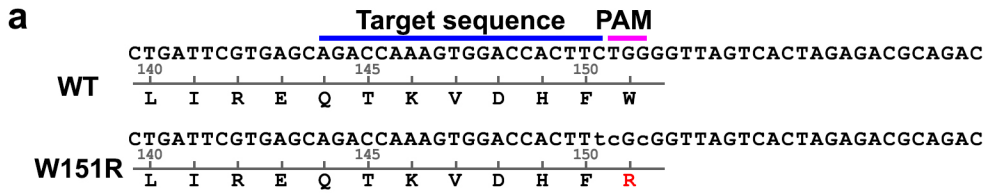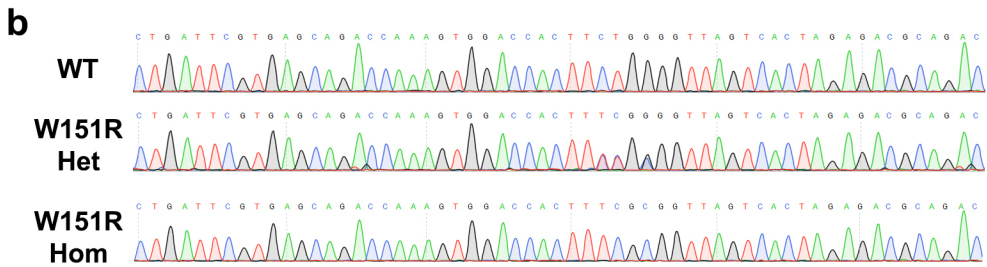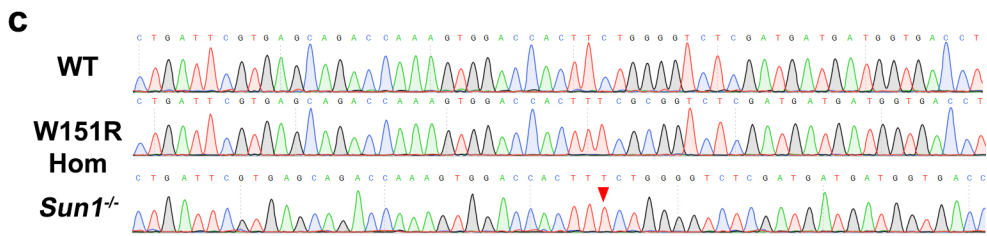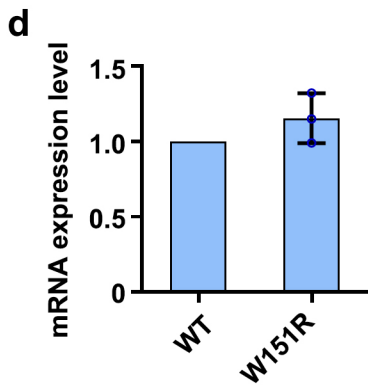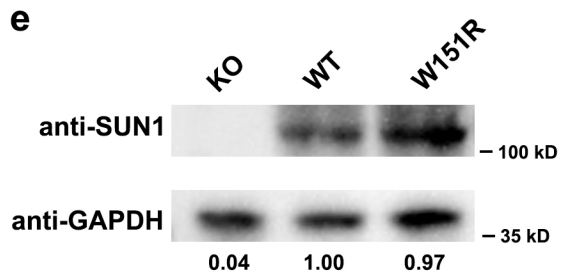



**Supplementary Figure 4: Targeted disruption of SUN1-SPDYA interaction in mice.**

**a**, The Cas9/sgRNA-targeting site for mouse *Sun1* mutation. The sgRNA-targeting site and the protospacer adjacent motif (PAM) are indicated above the sequence. The desired mutation on genomic DNA is indicated by lower-case letters. The altered amino acid residue is indicated in red color. **b**, Mouse offspring were genotyped by tail biopsy with PCR and DNA sequencing of the mutation loci. Het, heterozygote. Hom, homozygote. **c**, Testis cDNA library from homozygous mice was subjected to PCR and DNA sequencing to confirm the desired mutations. *Sun1*<sup>-/-</sup> mice contain a frameshift insertion at His149 (arrowhead). **d**, Relative mRNA levels of *Sun1* were determined by qPCR with testes from 2-week-old WT and mutant homozygous mice. Data are presented as the mean ± SD (n = 3 independent experiments with different mouse littermates). For each experiment, the relative mRNA levels of *Sun1* for WT was set as 1. **e**, Western blotting of SUN1 in testes of 2-week-old mice. GADPH was used as the loading control. Band intensity of blots was quantified by the ImageJ software and the signal for the WT sample was set as 1. Source data are provided as a Source Data file.

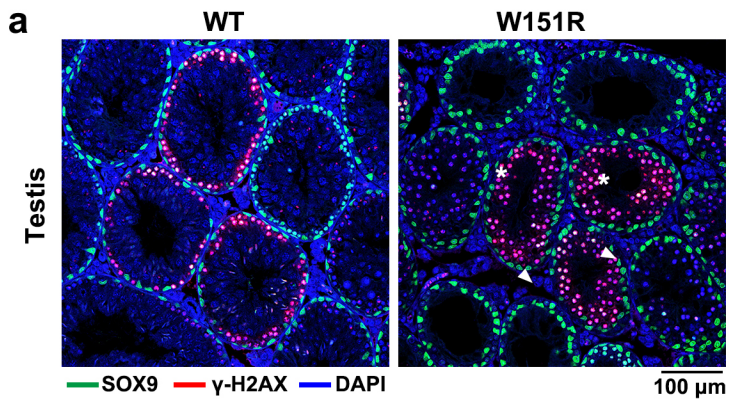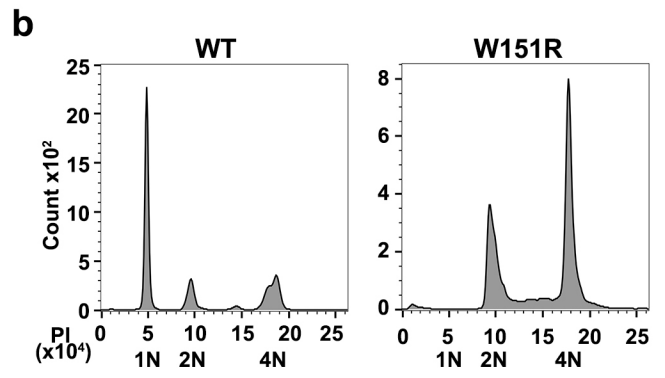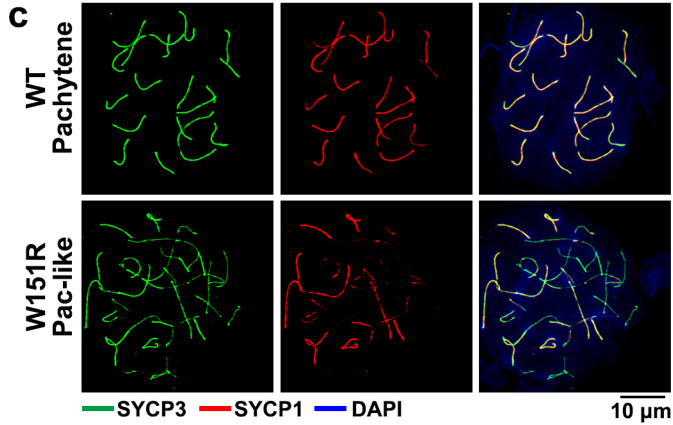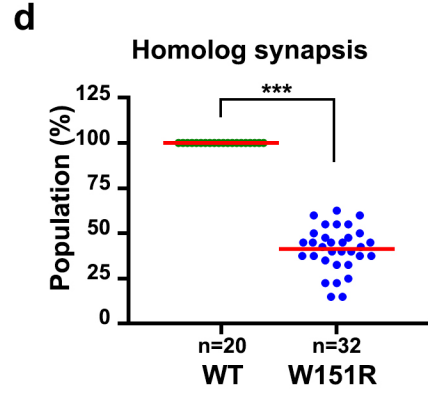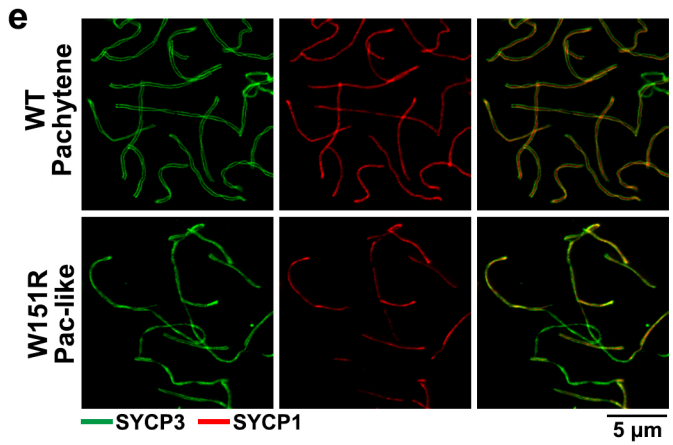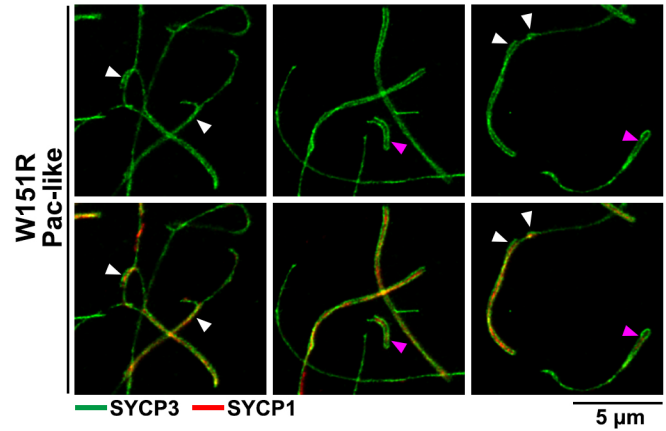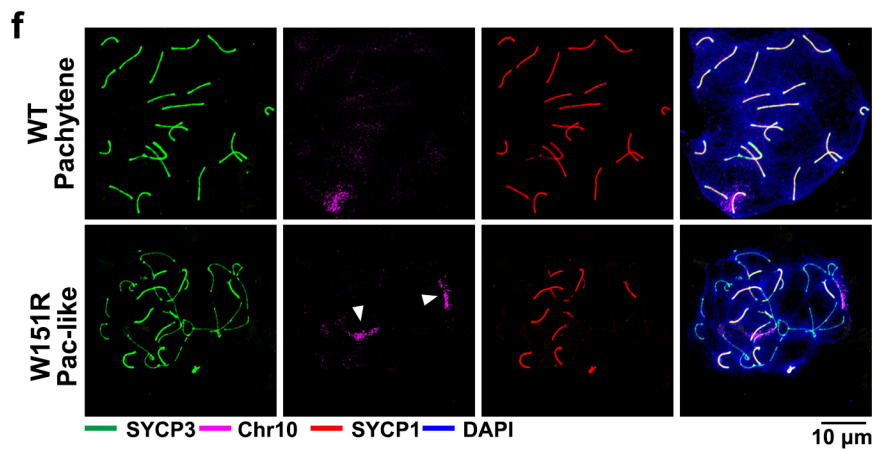

**Supplementary Figure 5: The SUN1-SPDYA interaction is indispensable for prophase I progression.**

**a**, IF staining for SOX9 (green) and  $\gamma$ -H2AX (red) of testis sections from adult mice. Arrowheads indicate abnormal spermatocyte-like cells with persistent  $\gamma$ -H2AX signal in mutant seminiferous tubules. Asterisks show seminiferous containing a single layer of sertoli cells and very few spermatogonial cells at the tubule periphery. DNA was stained by DAPI (blue). Scale bar, 100  $\mu$ m.

**b**, Propidium iodide (PI) fluorescence flow analysis of fixed testicular cells from 6-week-old male mice. Cells were stained by PI. 1N, haploid; 2N, diploid; 4N, tetraploid. **c**, IF staining of fetal oocyte chromosome spreads for SYCP3 (green) and SYCP1 (red). (Pac-like: Pachytene-like). Scale bar, 10  $\mu$ m. **d**, Population of fully paired homologous chromosomes in each WT pachytene or *W151R* pachytene-like ovaries from panel **c**. A total of n=20 WT and n=32 *W151R* ovary spreads were counted. Red lines indicated the mean values. A two-sided Student's *t*-test was performed, \*\*  $p = 7.9E-27$ . **e**, IF analysis by STED of SYCP3 (green) and SYCP1 (red) on spermatocyte spreads from adult mouse testes. Below: Representative STED images of *W151R* spreads showing aberrant synapsis. White arrowheads indicate pairing between non-homologous chromosomes and the purple arrowheads show self-pairing. Scale bars, 5  $\mu$ m. **f**, IF staining of SYCP3 (green) and SYCP1 (red) and FISH detection of chromosome 10 on spermatocyte spreads from adult testes of different genotypes. Scale bar, 10  $\mu$ m. Source data are provided as a Source Data file.

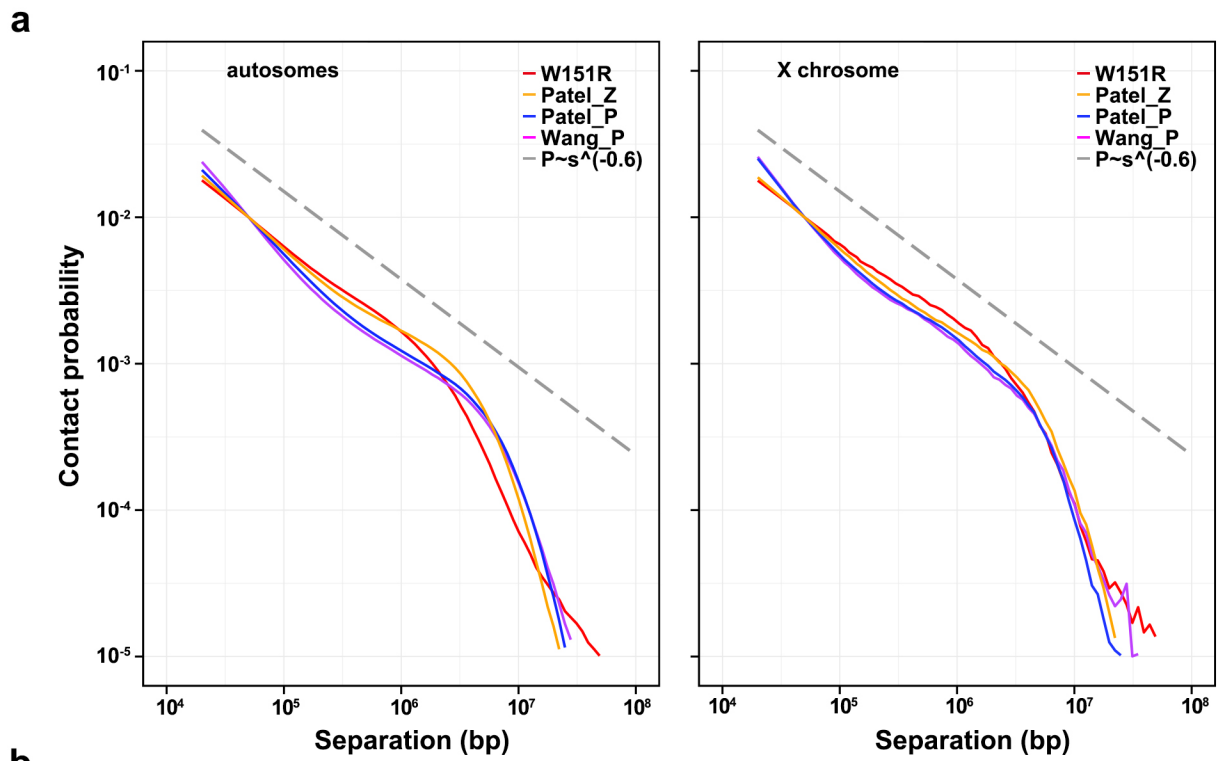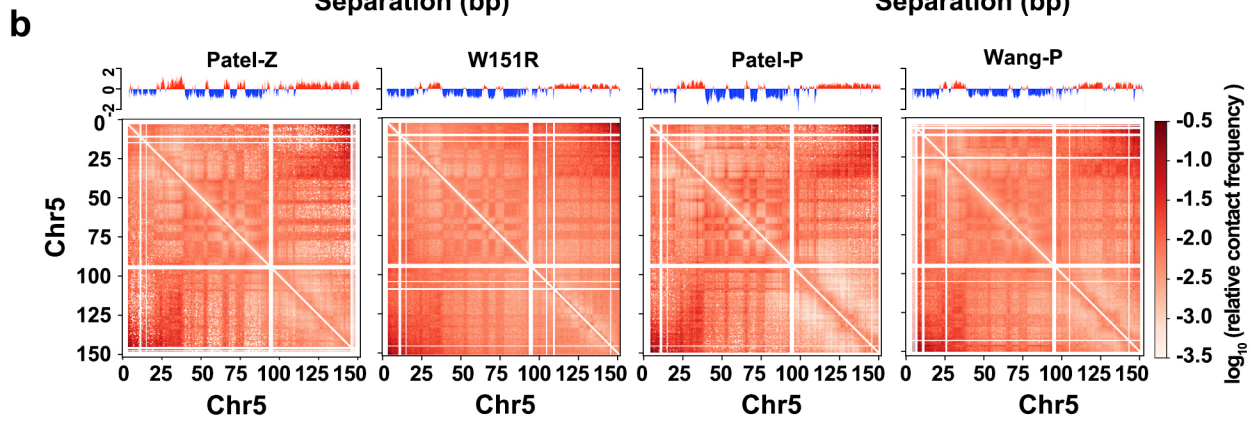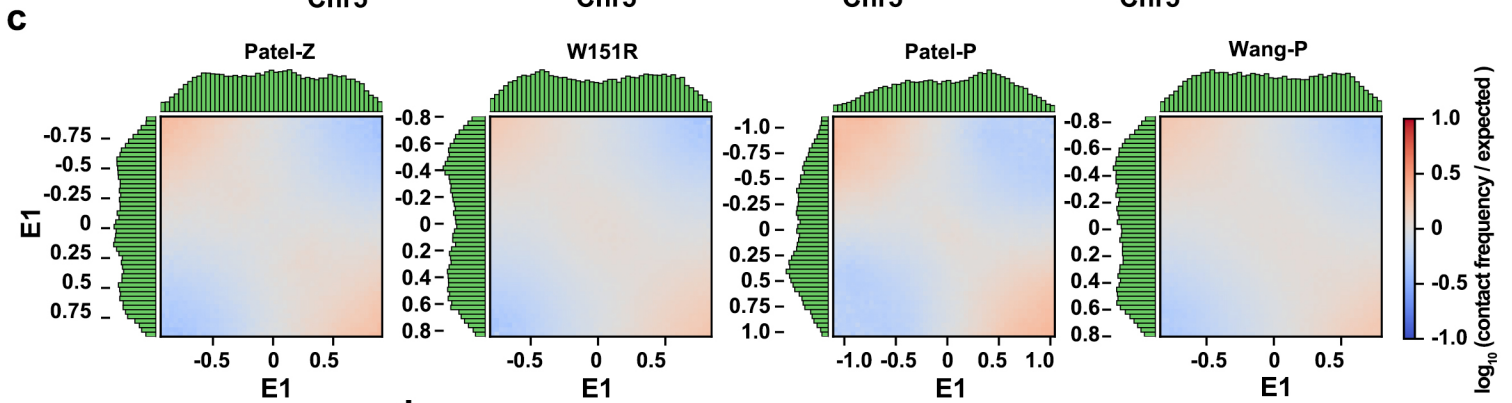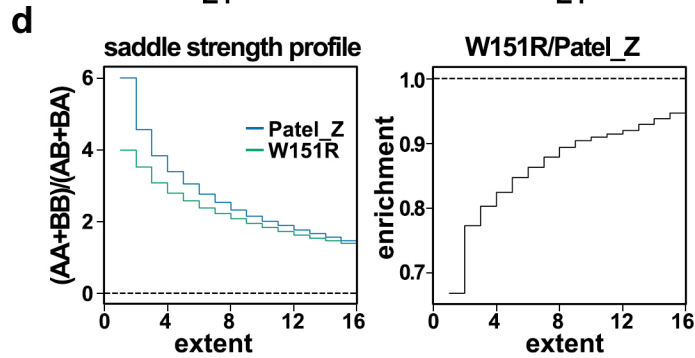

**Supplementary Figure 6: Disruption of the SUN1-SPDYA interaction affects 3D genome organization.**

**a**,  $P(s)$  curves showing relationships between chromatin contact probability and genomic separation for chromatin interactions on autosomes (left) and the X chromosome (right) in WT zygotene and pachytene spermatocytes as well as *W151R* mutant spermatocytes. Dotted lines corresponding to  $P(s) \sim s^{-0.6}$  and  $P(s) \sim s^{-1.2}$  are shown as references. WT data included in these analyses are from Patel et al (Patel\_Z and Patel\_P)<sup>25</sup> and Wang et al (Wang\_P)<sup>26</sup>. **b**, Heatmaps binned at 50 kb resolution showing normalized Hi-C interactions (observed/expected) for Chr5. Plots of eigenvector 1 values on top of heatmaps indicate positions of A (red) and B (blue) compartments. The A/B compartment identities for genomic regions are largely unchanged across different samples. **c**, Saddle plots indicating the extent of genome compartmentalization in each dataset. **d**, Saddle strength profiles quantifying the strength of genome compartmentalization by calculating ratios of cumulative corner interaction scores from the saddle plots  $((AA+BB)/(AB+BA))$ . Compared to WT zygotene spermatocytes, the *W151R* mutant spermatocytes exhibit weaker compartmentalization.

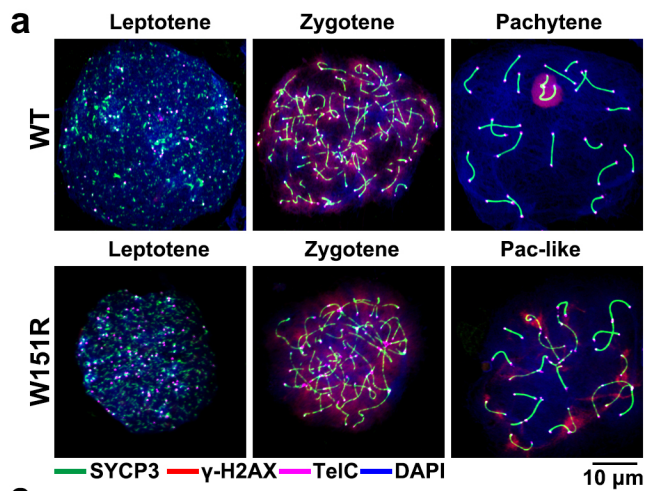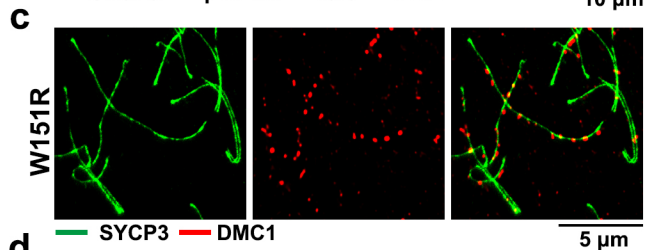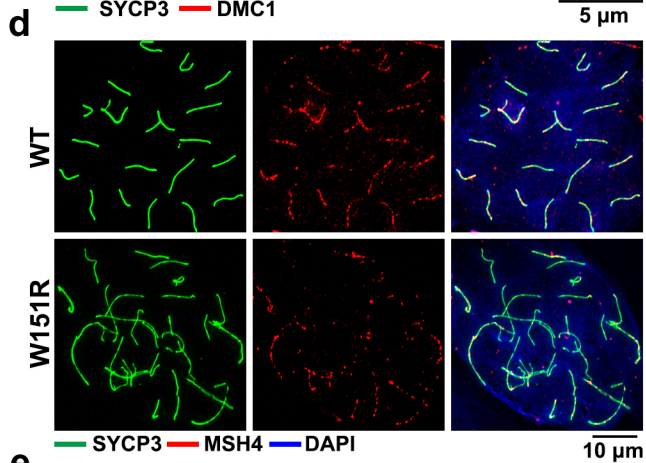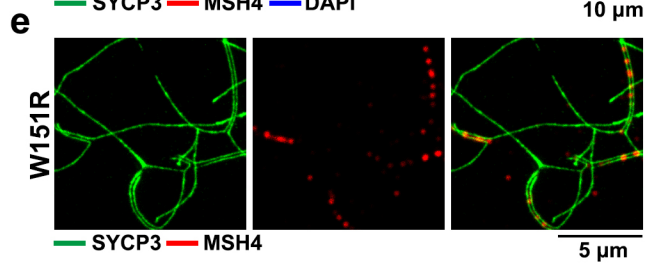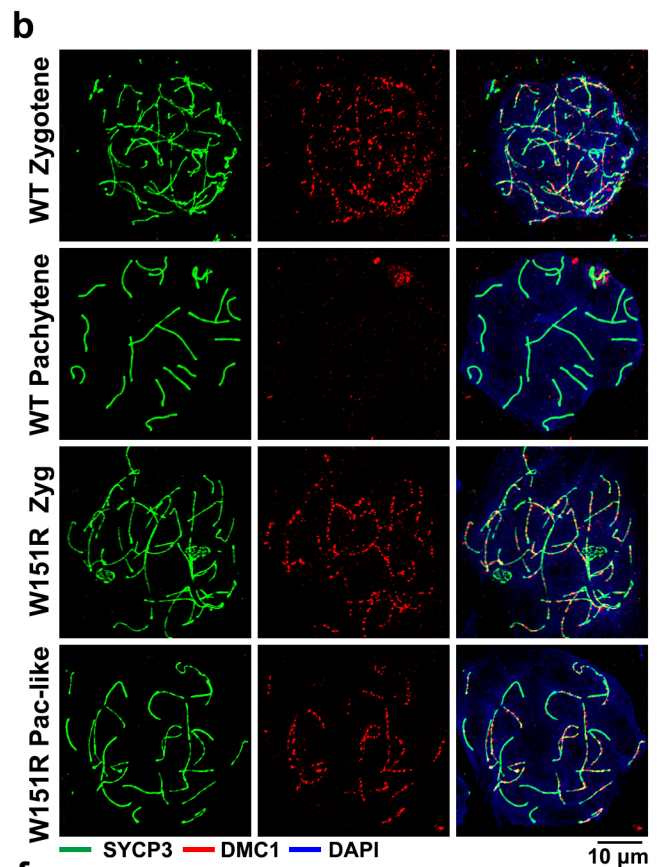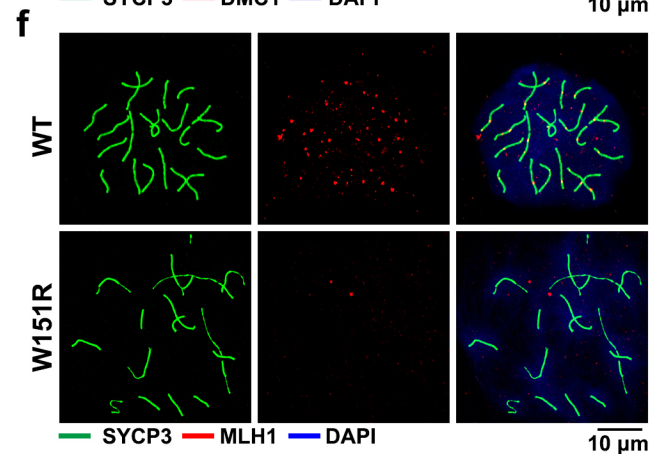

**Supplementary Figure 7: Disruption of the SUN1-SPDYA interaction interferes with meiotic DSB repair.**

**a**, Representative spermatocyte nuclei from 6-week-old mice at different indicated stages stained with anti-SYCP3 antibody (green) and anti- $\gamma$ -H2AX antibody (red). DNA was stained by DAPI (blue). **b**, IF analysis of spermatocyte chromosome spreads stained with anti-SYCP3 antibody (green) and anti-DMC1 antibody (red). **c**, IF analysis by STED of *W151R* spermatocyte spreads stained with anti-SYCP3 antibody (green) and anti-DMC1 antibody (red). **d**, IF analysis of spermatocyte chromosome spreads stained with anti-SYCP3 antibody (green) and anti-MSH4 antibody (red). **e**, IF analysis by STED of *W151R* spermatocyte spreads stained with anti-SYCP3 antibody (green) and anti-MSH4 antibody (red). **f**, IF analysis of spermatocyte chromosome spreads stained with anti-SYCP3 antibody (green) and anti-MLH1 antibody (red).

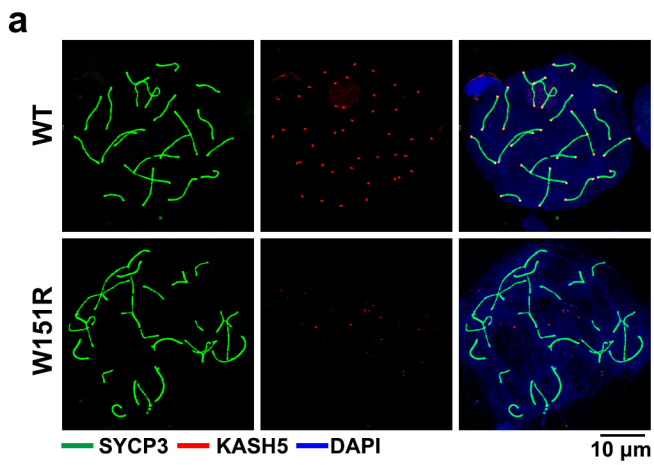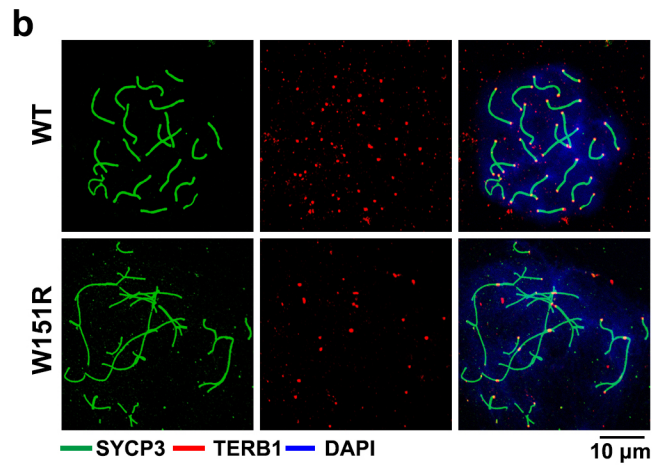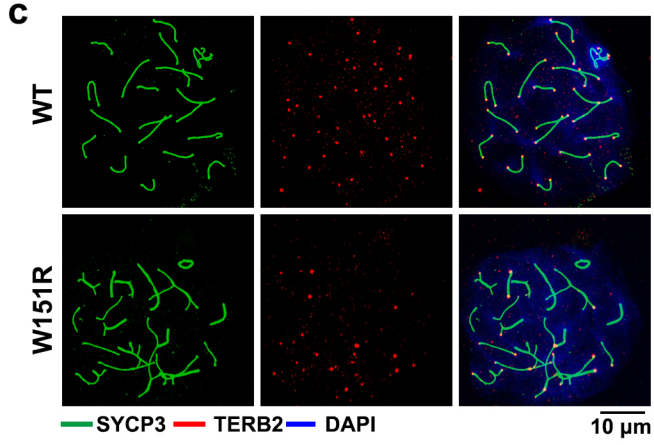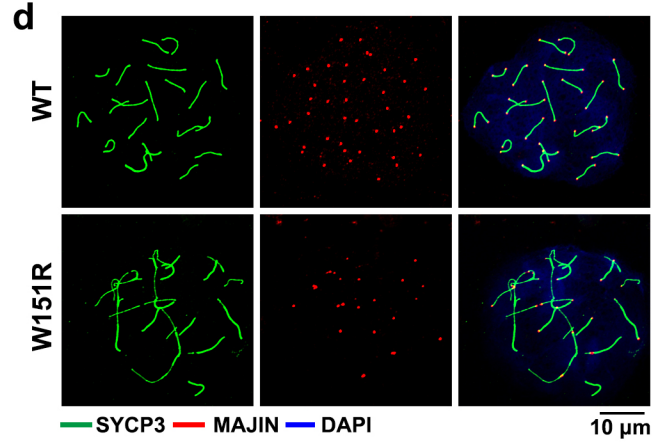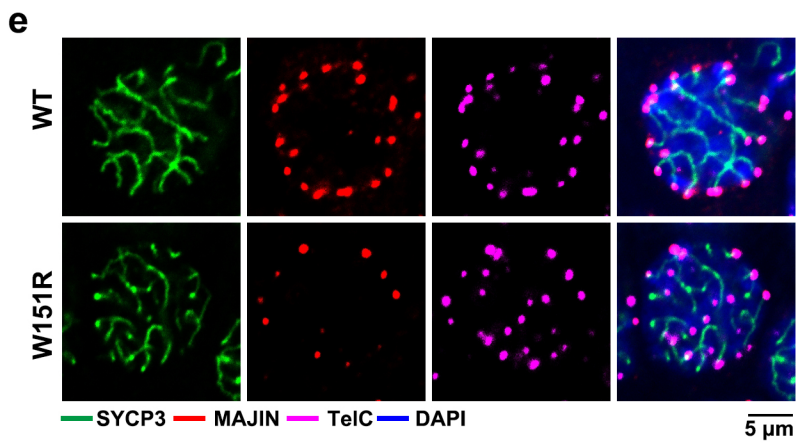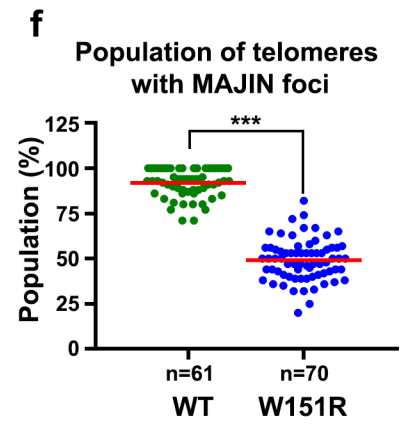



**Supplementary Figure 8: Telomeres are partially retained at the nuclear periphery with TTM in mutant spermatocytes.**

**a-d**, IF staining of spermatocyte chromosome spreads for SYCP3 (green) and KASH5 (red), TERB1 (red), TERB2 (red), or MAJIN (red) as indicated. DNA was stained by DAPI (blue). **e**, Equator images of structurally preserved zygotene spermatocytes stained for SYCP3 (green), MAJIN (red) and telomere FISH (TelC, magenta). Scale bar, 5  $\mu$ m. **f**, Population of telomeres displaying MAJIN foci in each spermatocyte nucleus as shown in panel **e**. A total of n=61 WT and n=70 *W151R* spermatocytes were counted. Red lines indicated the mean values. A two-sided Student's *t*-test was performed, \*\*\*  $p=4.7E-51$ . Source data are provided as a Source Data file.

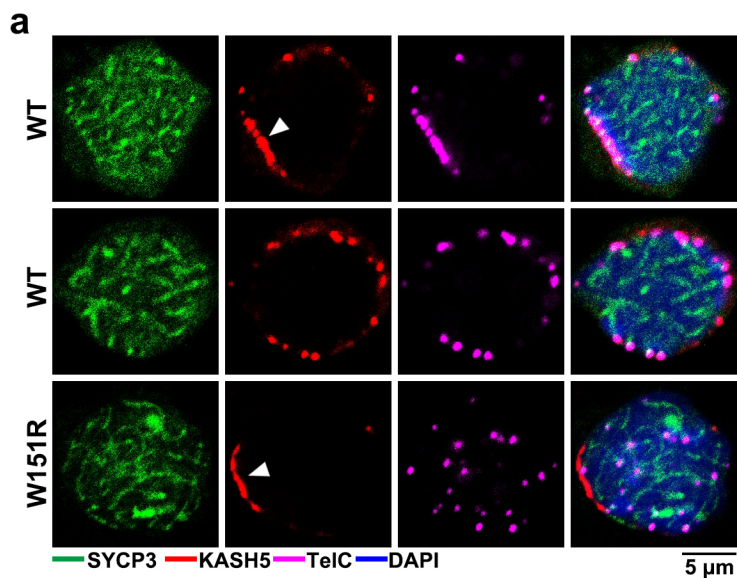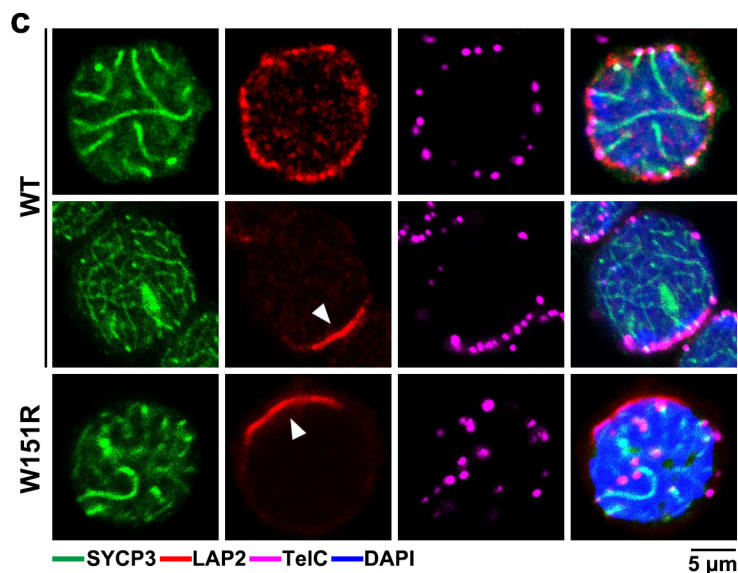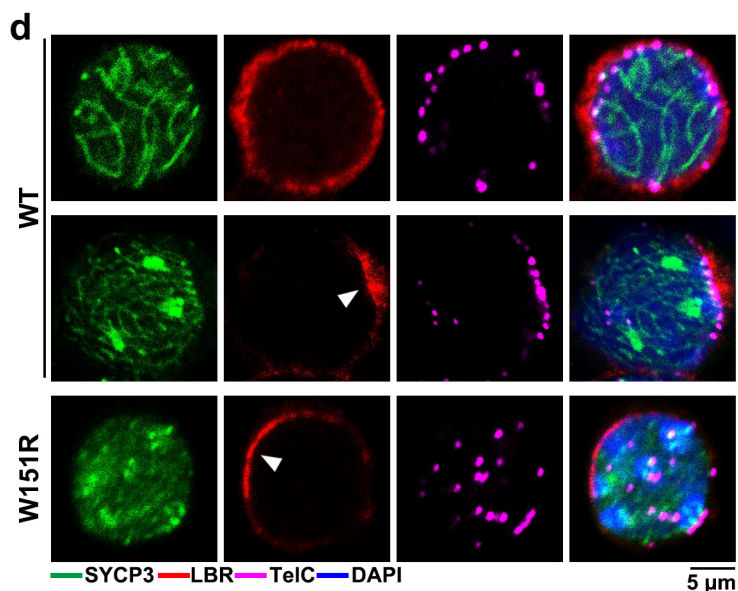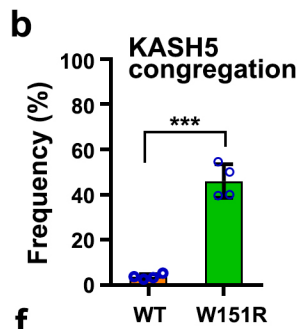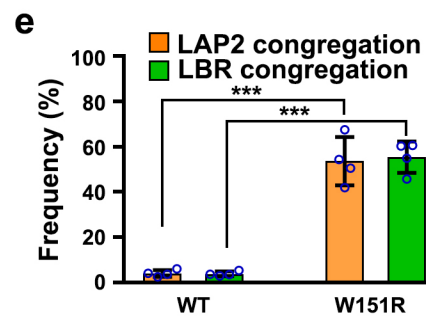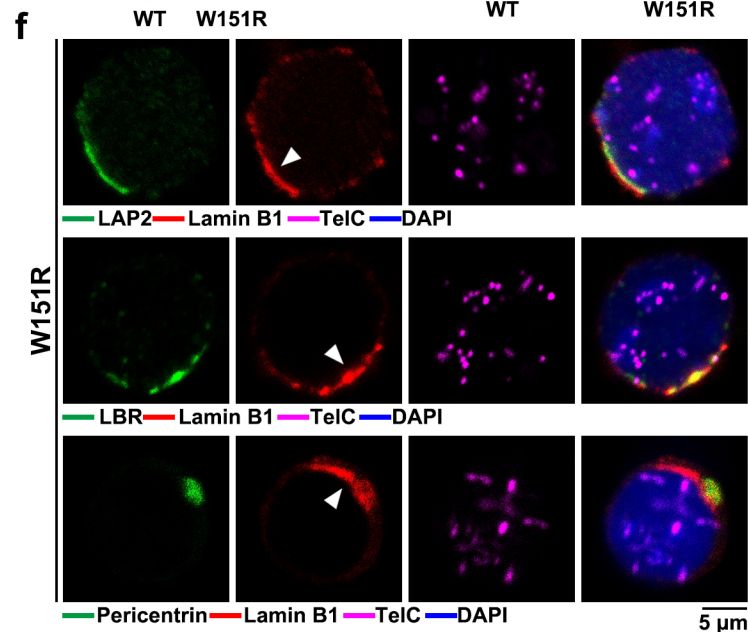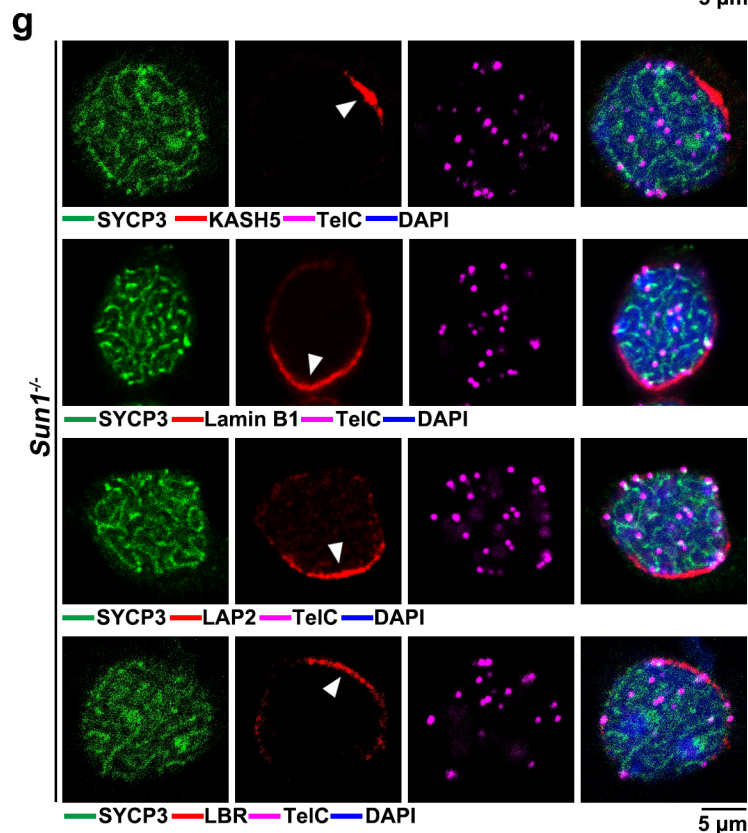

**Supplementary Figure 9: Disruption of the SUN1-SPDYA interaction interferes with the distribution of the LINC complex and lamina at the NE.**

**a**, Equator images of structurally preserved zygotene spermatocytes stained for SYCP3 (green), KASH5 (red) and telomeric DNA (TelC probe, magenta). Arrowheads indicate clustered signals for KASH5. DNA was stained with DAPI (blue). Scale bar, 5  $\mu\text{m}$ . **b**, Population of nuclei displaying KASH5 congregation in panel **a**. Data are presented as the mean  $\pm$  SD ( $n = 4$  mice of each indicated genotype). A two-sided Student's *t*-test was performed, \*\*\*  $p = 2.9\text{E-}5$ . More than 100 spermatocytes from each indicated genotype were counted. **c**, Equator images of structurally preserved zygotene spermatocytes stained for SYCP3 (green), LAP2 (red) and telomeric DNA (TelC probe, magenta). Arrowheads indicate congregated signals for LAP2. Scale bar, 5  $\mu\text{m}$ . **d**, Equator images of structurally preserved zygotene spermatocytes stained for SYCP3 (green), LBR (red) and telomeric DNA (TelC probe, magenta). Arrowheads indicate congregated signals for LBR. Scale bar, 5  $\mu\text{m}$ . **e**, Population of nuclei exhibiting LAP2 or LBR congregation in panels **c** and **d**, respectively. Data are presented as the mean  $\pm$  SD ( $n = 4$  mice of each indicated genotype). A two-sided Student's *t*-test was performed, \*\*\*  $p = 9.2\text{E-}5$  (LAP2) and \*\*\*  $p = 6.2\text{E-}6$  (LBR). More than 100 spermatocytes from each indicated genotype were counted. **f**, Equator images of structurally preserved zygotene spermatocytes stained with indicated antibodies and telomere FISH probe. Arrowheads indicate congregated signals for Lamin B1. Scale bar, 5  $\mu\text{m}$ . **g**, Equator images of structurally preserved zygotene spermatocytes stained with indicated antibodies and telomere FISH probe. Arrowheads indicate congregated signals for KASH5, Lamin B1, LAP2 and LBR, respectively. Scale bar, 5  $\mu\text{m}$ . Source data are provided as a Source Data file.

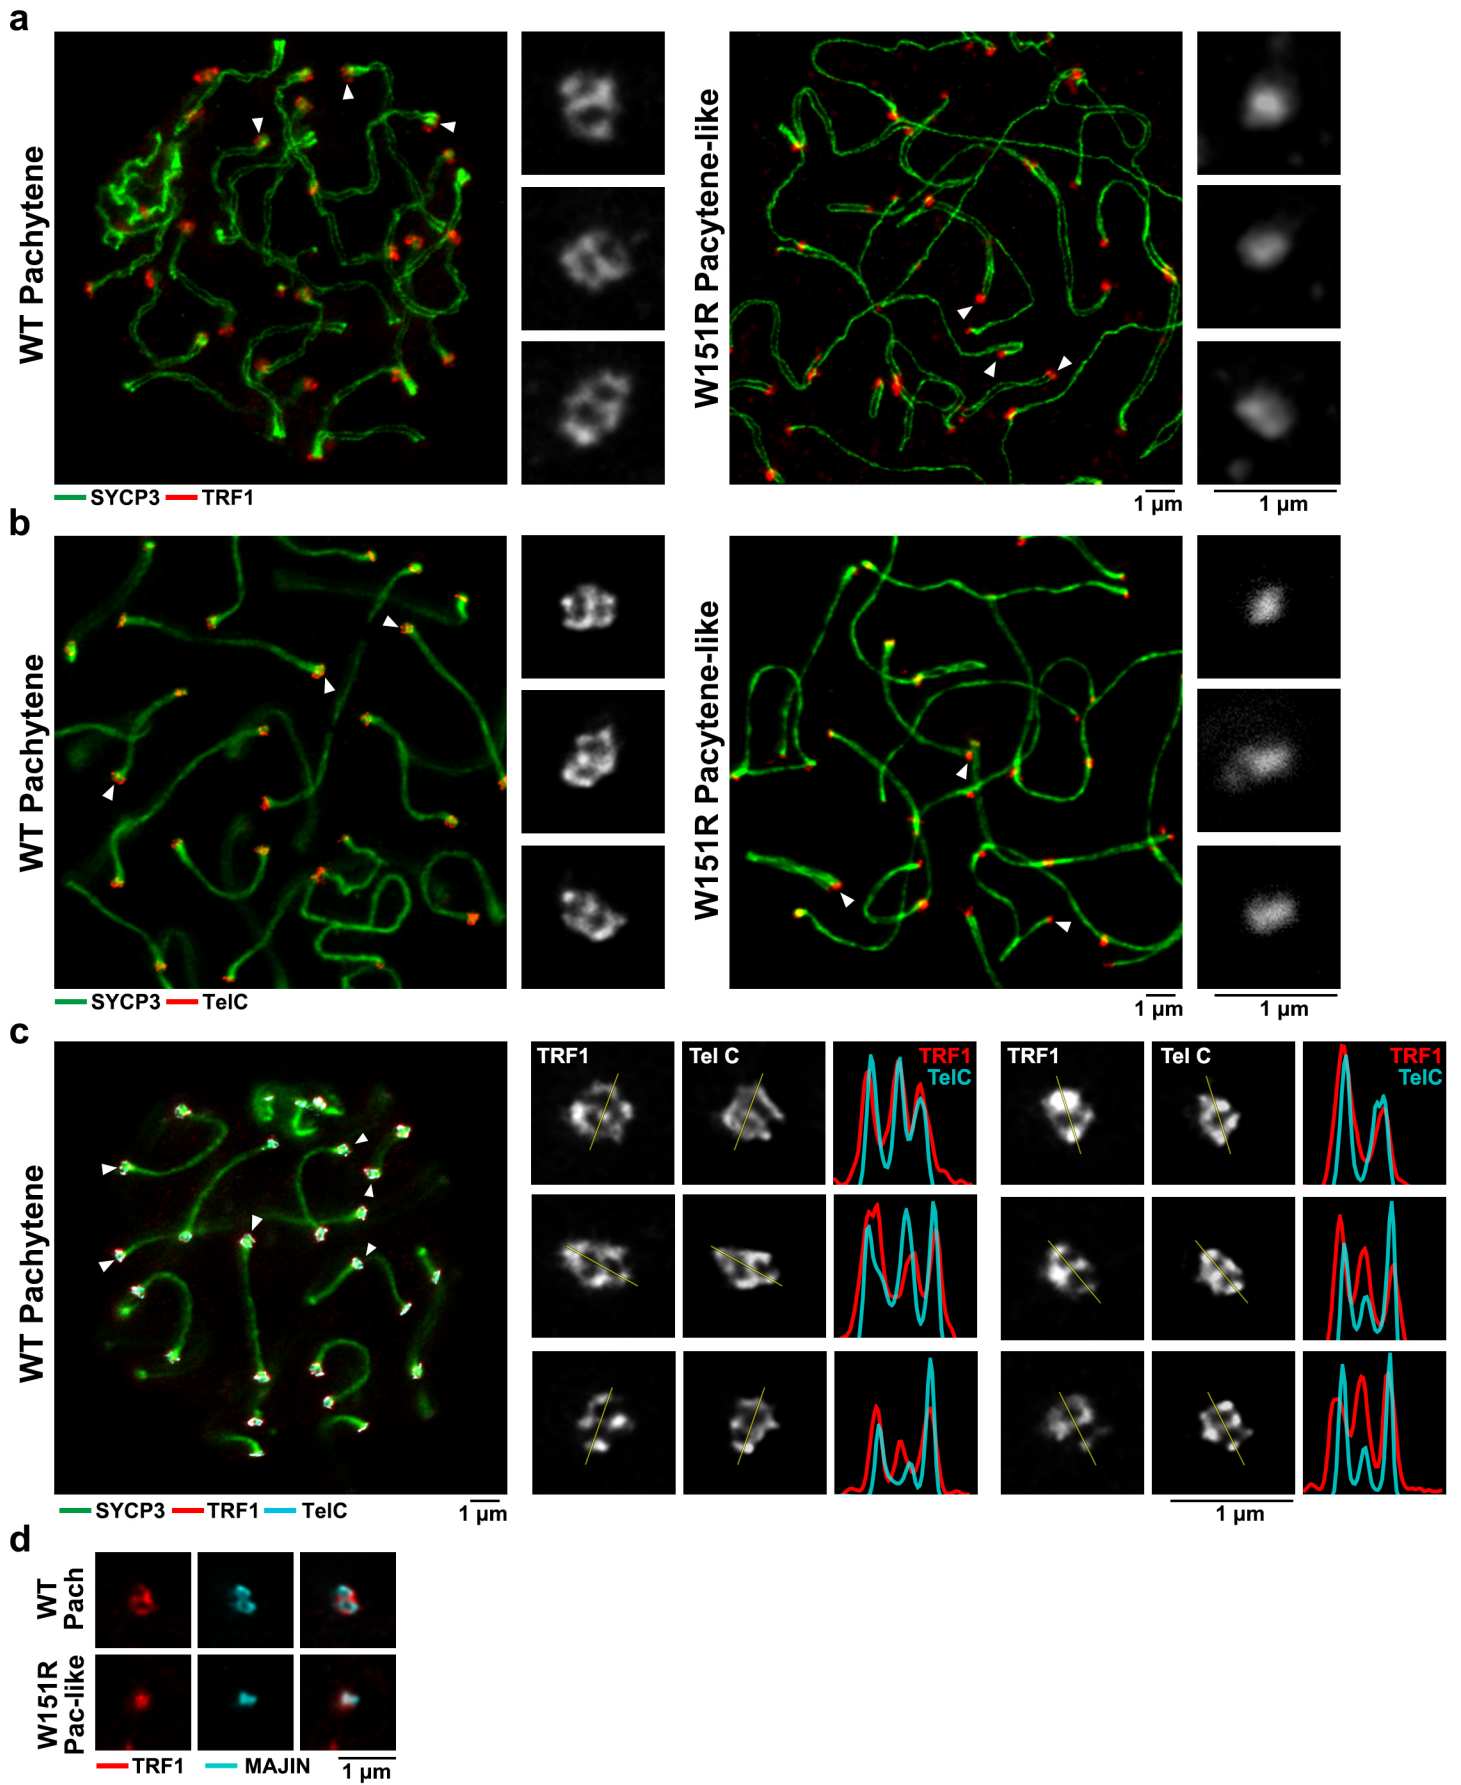

**Supplementary Figure 10: Meiotic telomere structures at the INM.**

**a**, IF analysis by STED of spermatocyte chromosome spreads stained for SYCP3 (green) and TRF1 (red). Insets are enlarged figures of telomere architectures indicated by arrowheads. Although *W151R* pachytene-like spermatocytes exhibited both asynapsed axial elements (AEs) and synapsed lateral elements (LEs), no ring-shaped structures were observed at chromosome tips. Scale bar: 1  $\mu\text{m}$ . **b**, IF-FISH analysis of spermatocyte chromosome spreads stained for SYCP3 (green) and telomeric DNA (telC, red). Insets are enlarged figures of telomere architectures indicated by arrowheads. No ring-shaped structures were observed at chromosome tips. Scale bar: 1  $\mu\text{m}$ . **c**, Co-localization of TRF1 and telomeric DNA revealed by STED microscopic analysis. Scale bar: 1  $\mu\text{m}$ . **d**, IF analysis by STED of spermatocyte spreads stained for TRF1 (red) and MAJIN (cyan). Scale bar, 1  $\mu\text{m}$ .

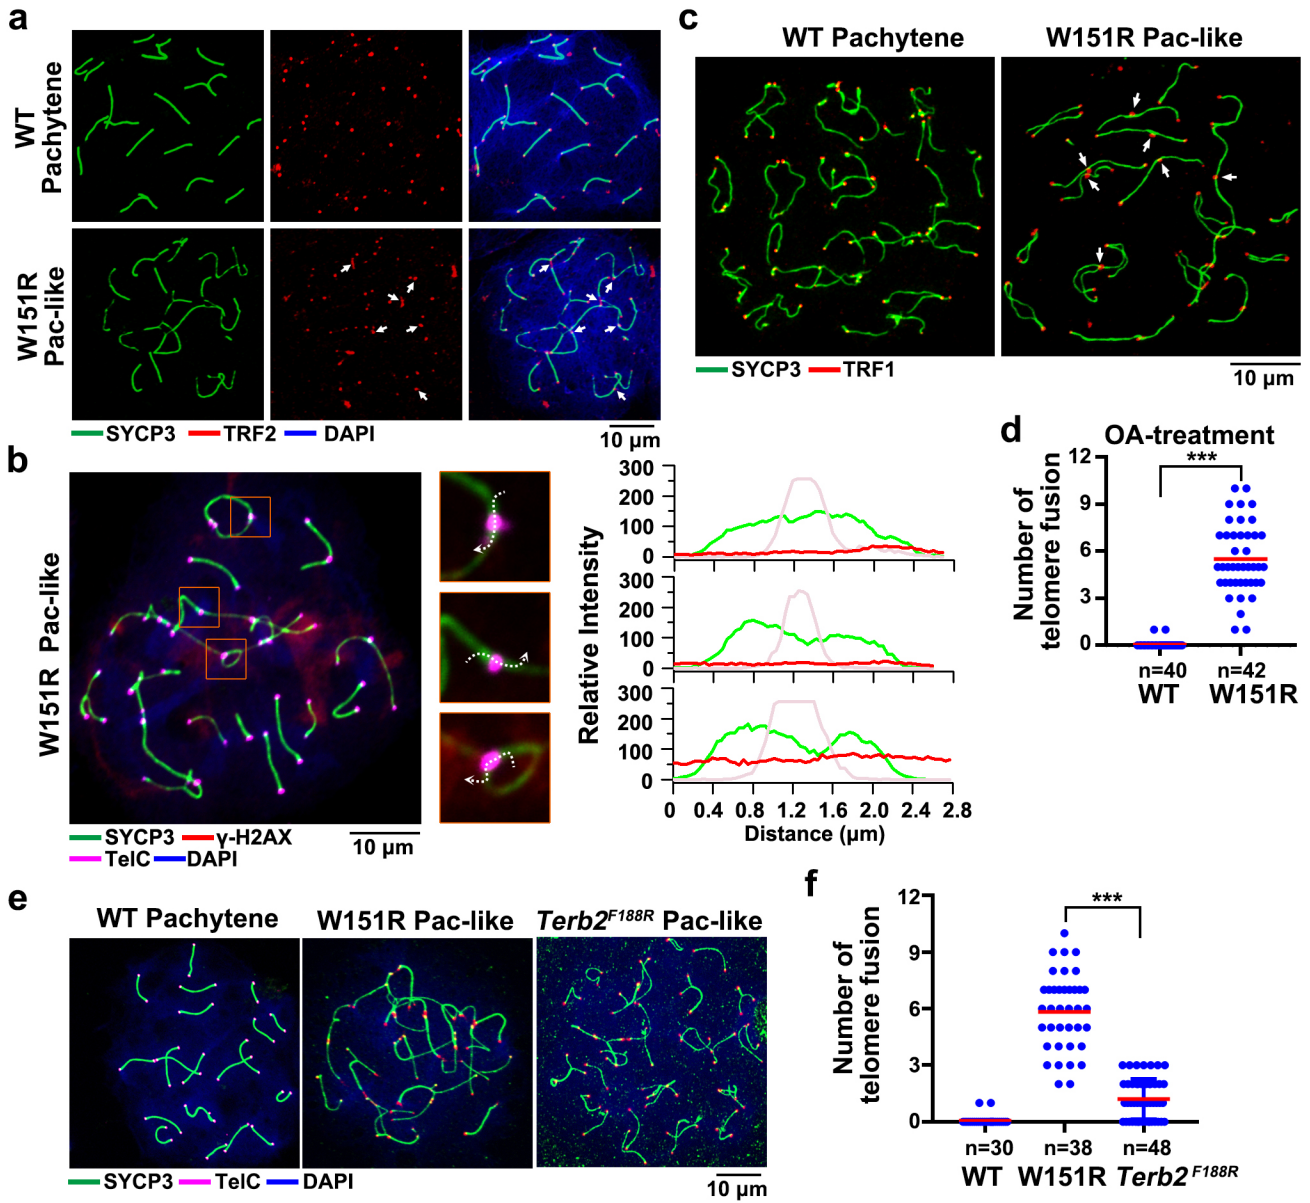

**Supplementary Figure 11: Disruption of the SUN1-SPDYA interaction causes telomere fusions.**

**a**, IF analysis of spermatocyte spreads from adult mice stained for SYCP3 (green) and TRF2 (red). DNA was stained by DAPI (blue). Arrowheads indicate telomere fusions and bridges. Scale bar, 10  $\mu$ m. **b**, IF-FISH analysis of mutant spermatocyte spreads stained for SYCP3 (green),  $\gamma$ -H2AX (red) and telomeric DNA (telC, magenta). Telomere fusions shown in the framed regions were analyzed for the signal distribution of SYCP3,  $\gamma$ -H2AX and telomeric DNA. Scale bar, 10  $\mu$ m. **c**, IF analysis of spermatocyte spreads from adult mice stained with indicated antibodies. Spermatocytes were incubated with 5  $\mu$ M Okadaic acid (OA) at 30 °C for 2 hours prior to chromosome spread preparation. Arrowheads indicate telomere fusions and bridges. Scale bar, 10  $\mu$ m. **d**, Quantification of number of telomere fusions and bridges per nucleus of WT (n = 40) and *W151R* (n = 42) spermatocytes in **c**. Red lines indicated the mean values. A two-sided Student's *t*-test was performed, \*\*\*  $p = 1.9E-25$ . **e**, IF-FISH images of chromosome spreads stained with indicated antibodies and telomere FISH probe. Scale bar, 10  $\mu$ m. **f**, Quantification of number of telomere fusions and bridges per nucleus of WT (n = 30), *W151R* (n = 38) and *Terb2*<sup>F188R</sup> spermatocytes in panel **e**. Red lines indicated the mean values. A two-sided Student's *t*-test was performed, \*\*\*  $p = 6.3E-23$ . Source data are provided as a Source Data file.

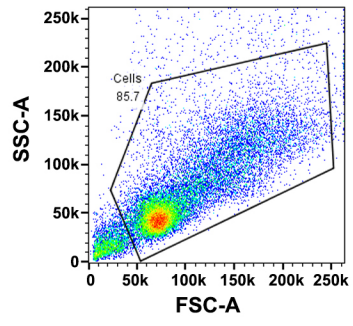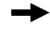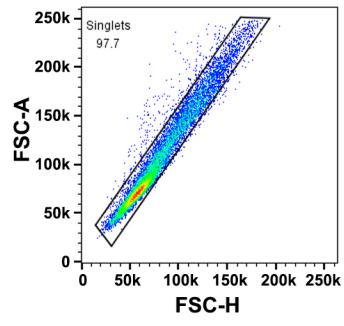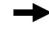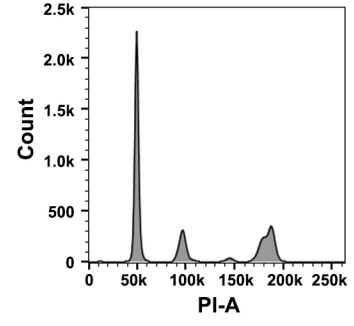



**Supplementary Figure 12: FACS gating strategy example for Supplementary Fig. 5b**

Testicular cells were first gated by FSC-A vs SSC-A to eliminate any debris, then gated for singlets by FSC-H vs FSC-A. spermatocytes were then determined from this gated population by PI staining.
