# Supplementary material for: The SUN1-SPDYA interaction plays an essential role in meiosis prophase I
Source: PubMed Central journal article supplement (PMC8155084; doi:10.1038/s41467-021-23550-w), 2021-05-26
Supplement: 41467_2021_23550_MOESM3_ESM.pdf [file 41467_2021_23550_MOESM3_ESM.pdf]

## **Description of Additional Supplementary Files**

File Name: Supplementary Data 1

Description: List of primers.
